# Supplementary material for: Differentiating moss from higher plants is critical in studying the carbon cycle of the boreal biome
Source: Springer Nature journal article supplement (doi:10.1038/ncomms5270), 2014-06-26
Supplement: 41467_2014_BFncomms5270_MOESM1146_ESM.pdf [file 41467_2014_BFncomms5270_MOESM1146_ESM.pdf]

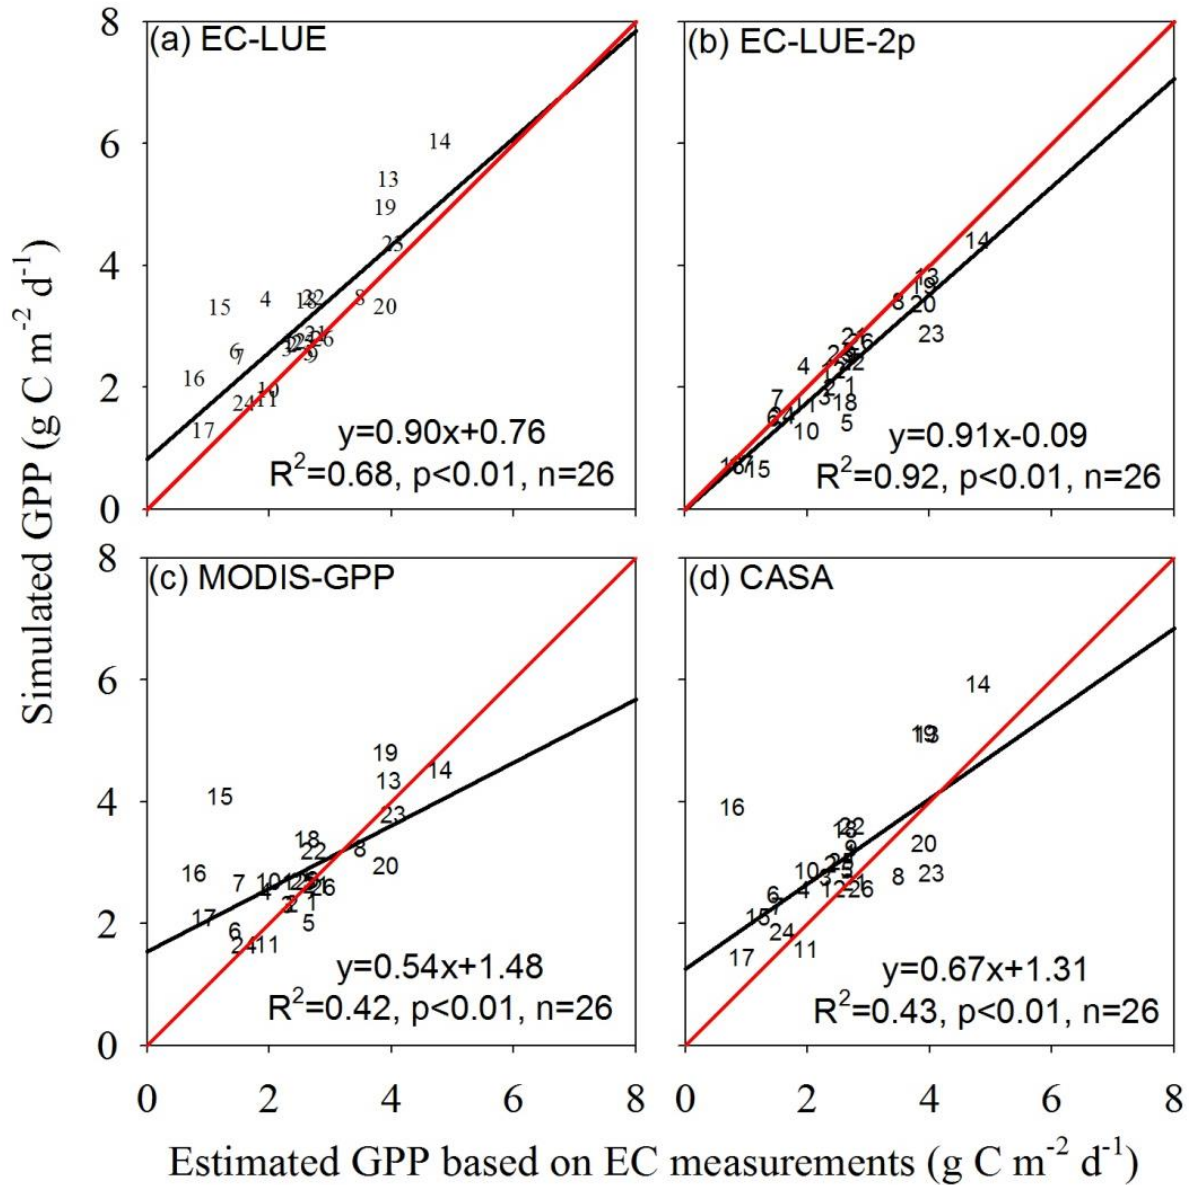

**Supplementary Figure 1.** The model performance of the EC-LUE model (a), EC-LUE-2p model (b), MODIS-GPP product (c) and CASA model (d) at all investigated sites. The values were site-averaged GPP over the study periods shown in Supplementary Table 1. The red lines are the 1:1 lines, and the black solid lines are the linear regression lines. The EC-LUE-2p model significantly improved GPP predictions by considering the impact of moss.

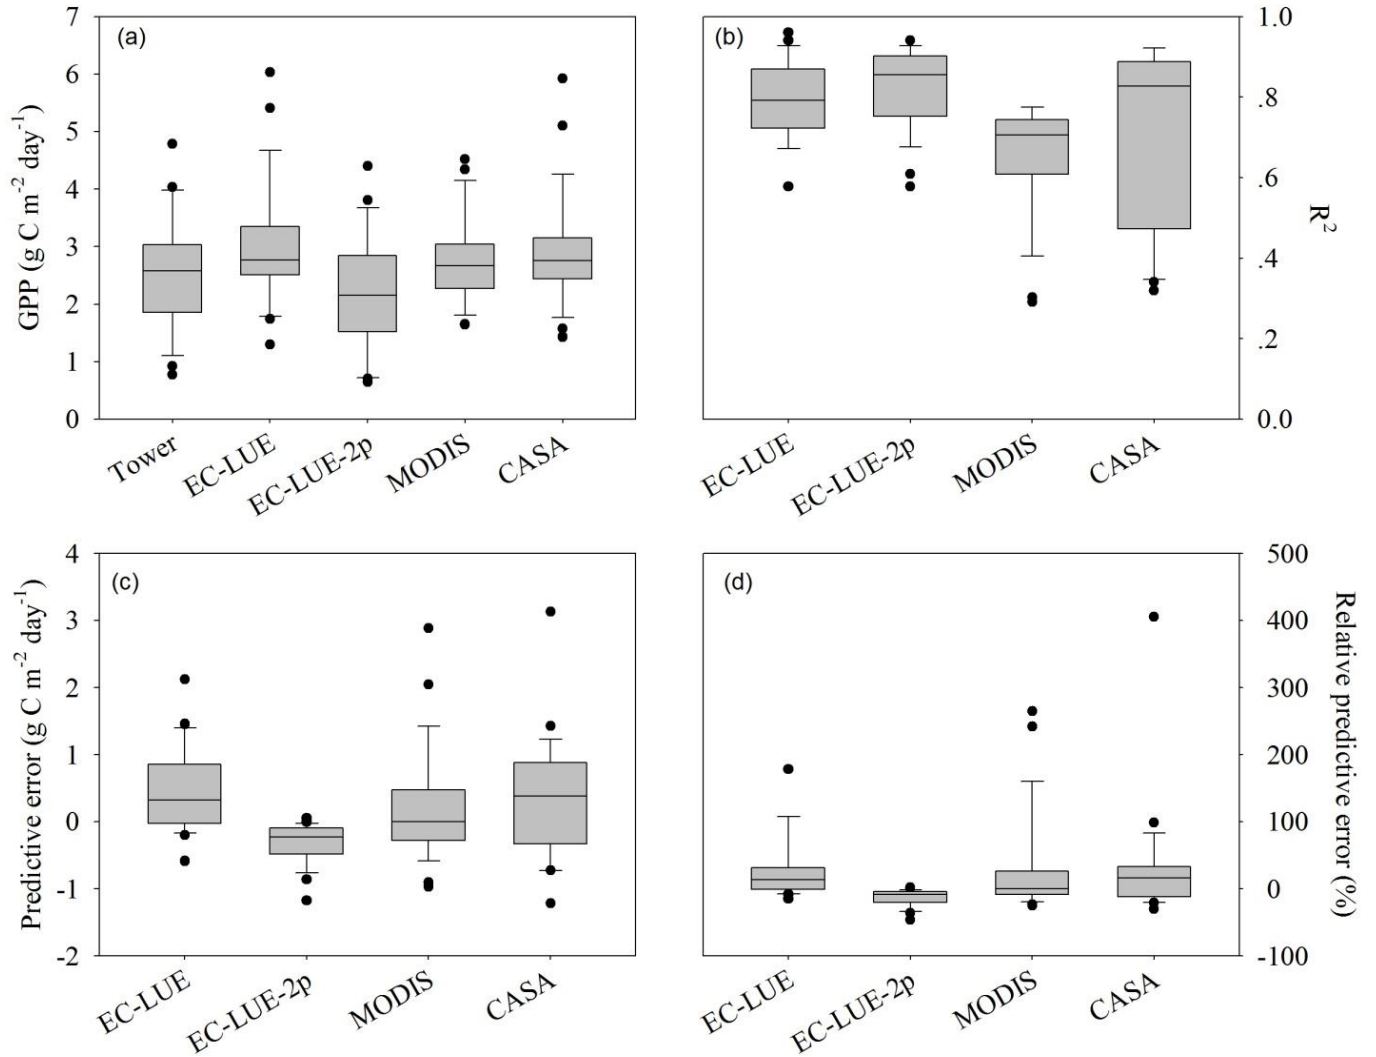

**Supplementary Figure 2.** Model comparison of simulated GPP values (a), coefficient of determination ( $R^2$ ) (b), predictive error (PE) (c) and relative predictive error (RPE) (d) among the EC-LUE, EC-LUE-2p, MODIS-GPP, and CASA models. Boxplots with median, upper and lower quantiles, minimum and maximum or outliers (points).

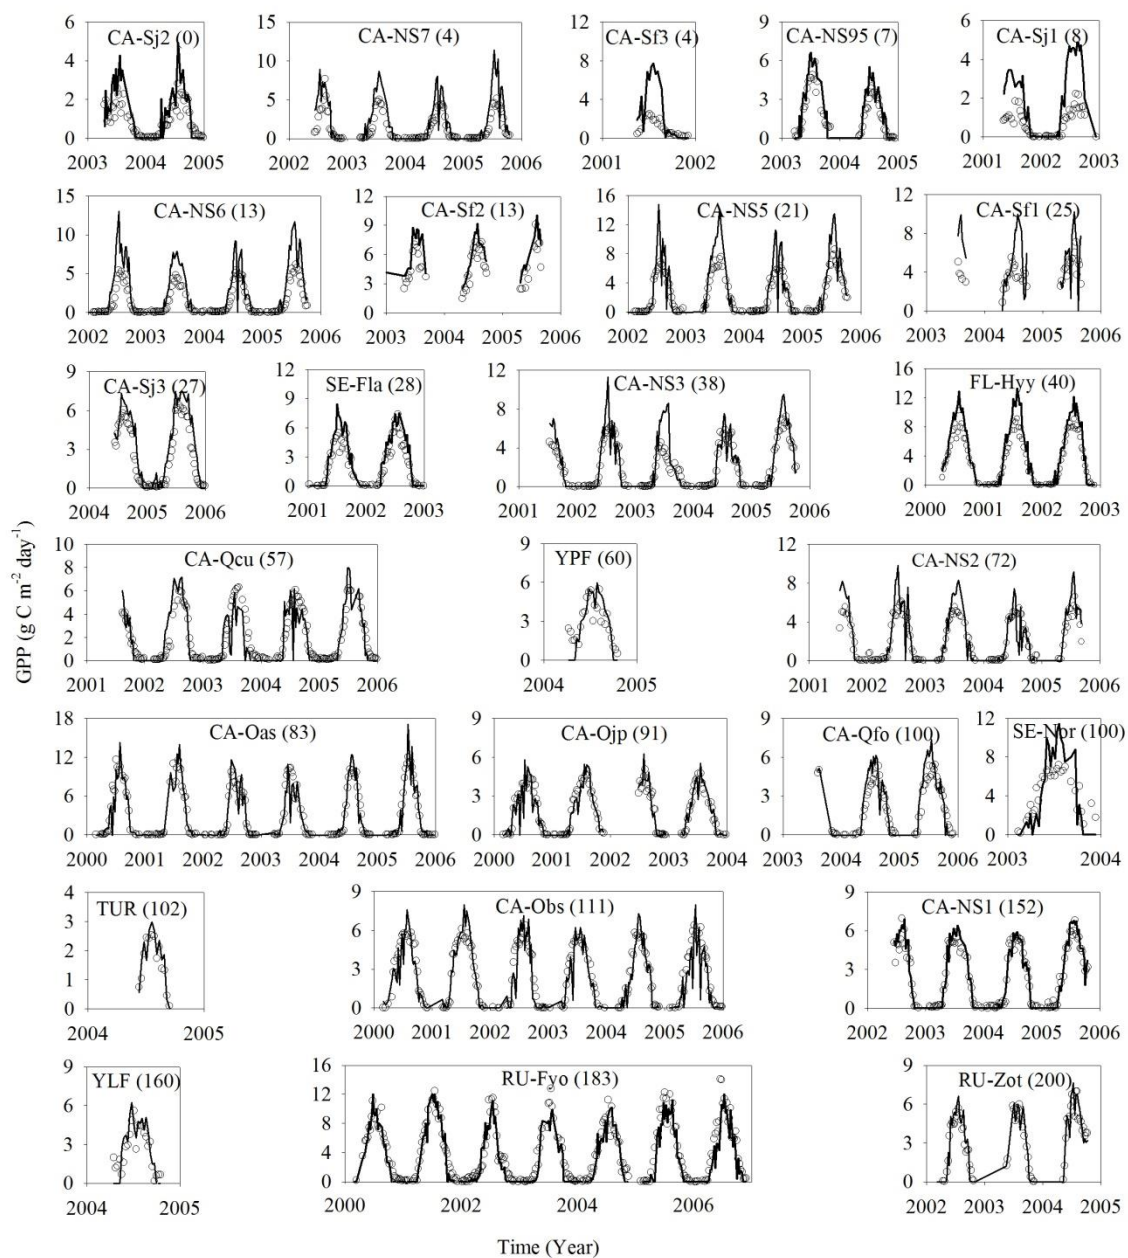

**Supplementary Figure 3.** Eight-day variation in estimated GPP from EC measurements (open circles) and predicted GPP using the EC-LUE model (black solid lines) at all sites. The numbers within parentheses are stand age.

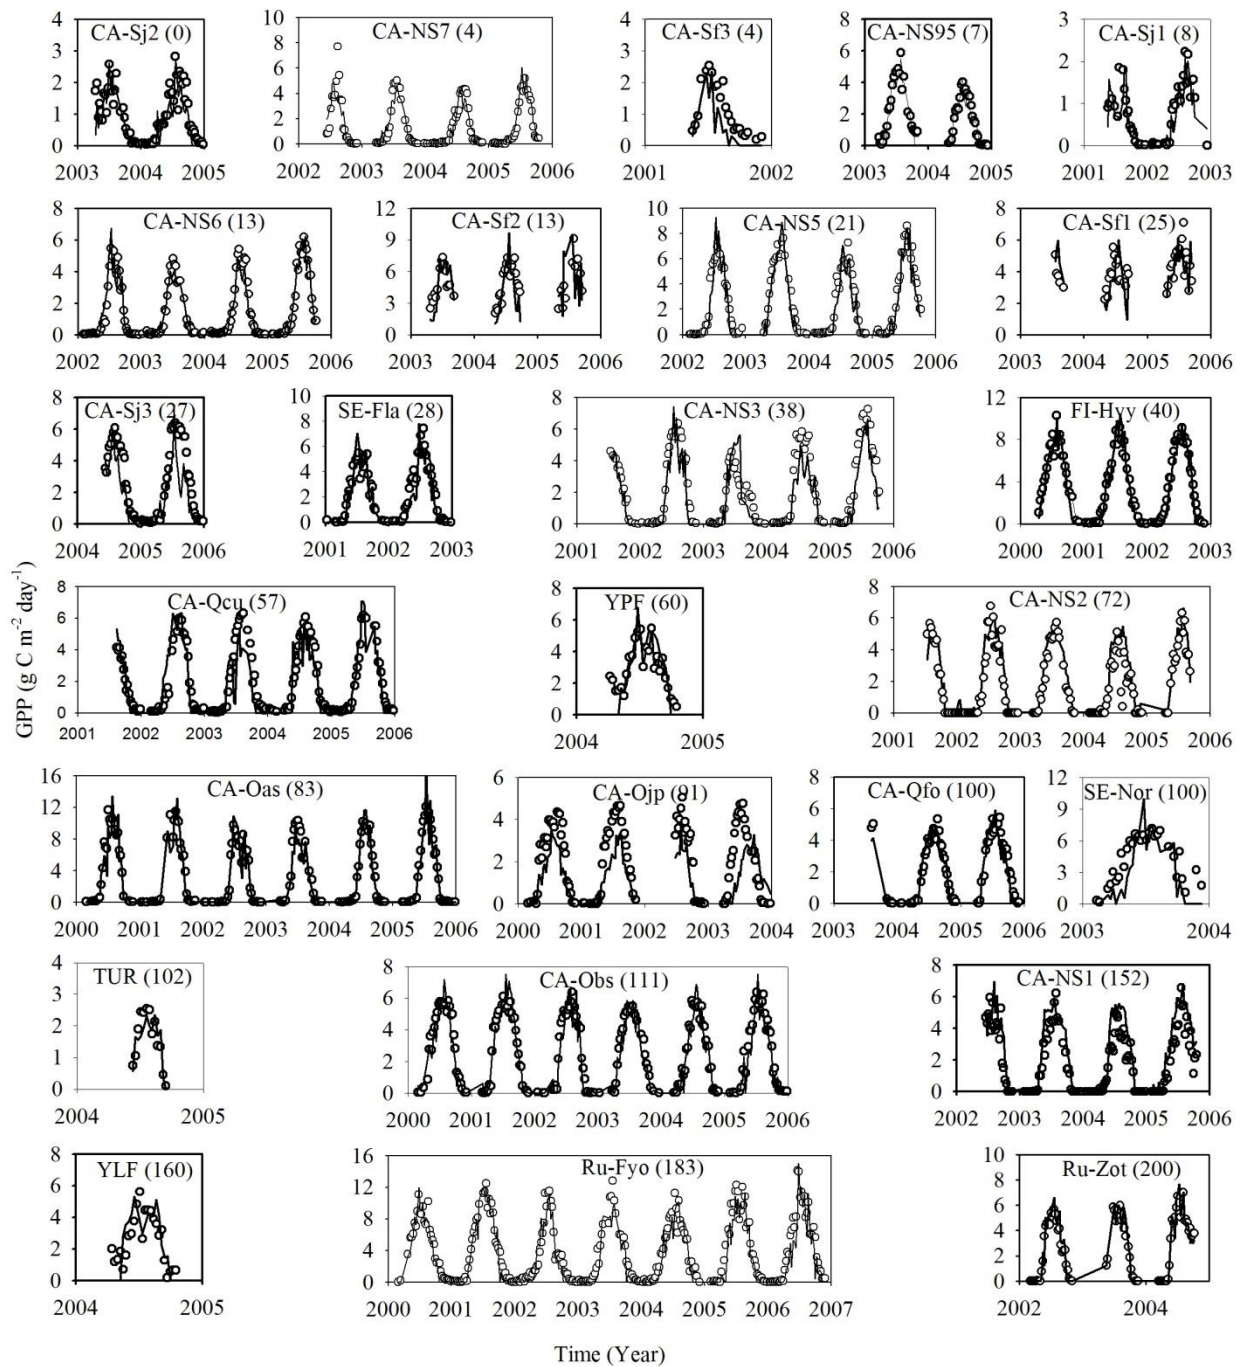

**Supplementary Figure 4.** Eight-day variation in estimated GPP from EC measurements (open circles) and predicted GPP using the EC-LUE-2p model (black solid lines) at all sites. The numbers within parentheses are stand age.

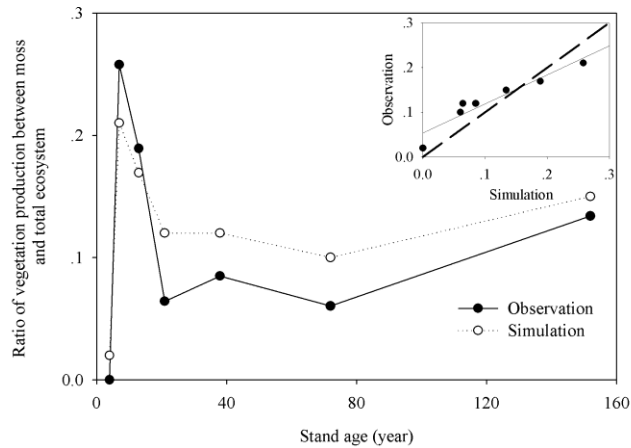

**Supplementary Figure 5.** Fractional contribution of moss to ecosystem GPP (simulated) and NPP (observed). Observations of mosses and vascular plants derived from the previous study<sup>1</sup>. Stand age for each site: CA-NS7 (4 year), CA-NS95 (7 year), CA-NS6 (13 year), CA-NS5 (21 year), CA-NS3 (38 year), CA-NS2 (72 year) and CA-NS1 (152 year). The insert shows the comparison of simulated and observed ratio. The dashed line is the 1:1 line, and the regression line is  $y = 0.64x + 0.05$ ,  $R^2 = 0.89$ ,  $n = 7$ ,  $p < 0.05$ .



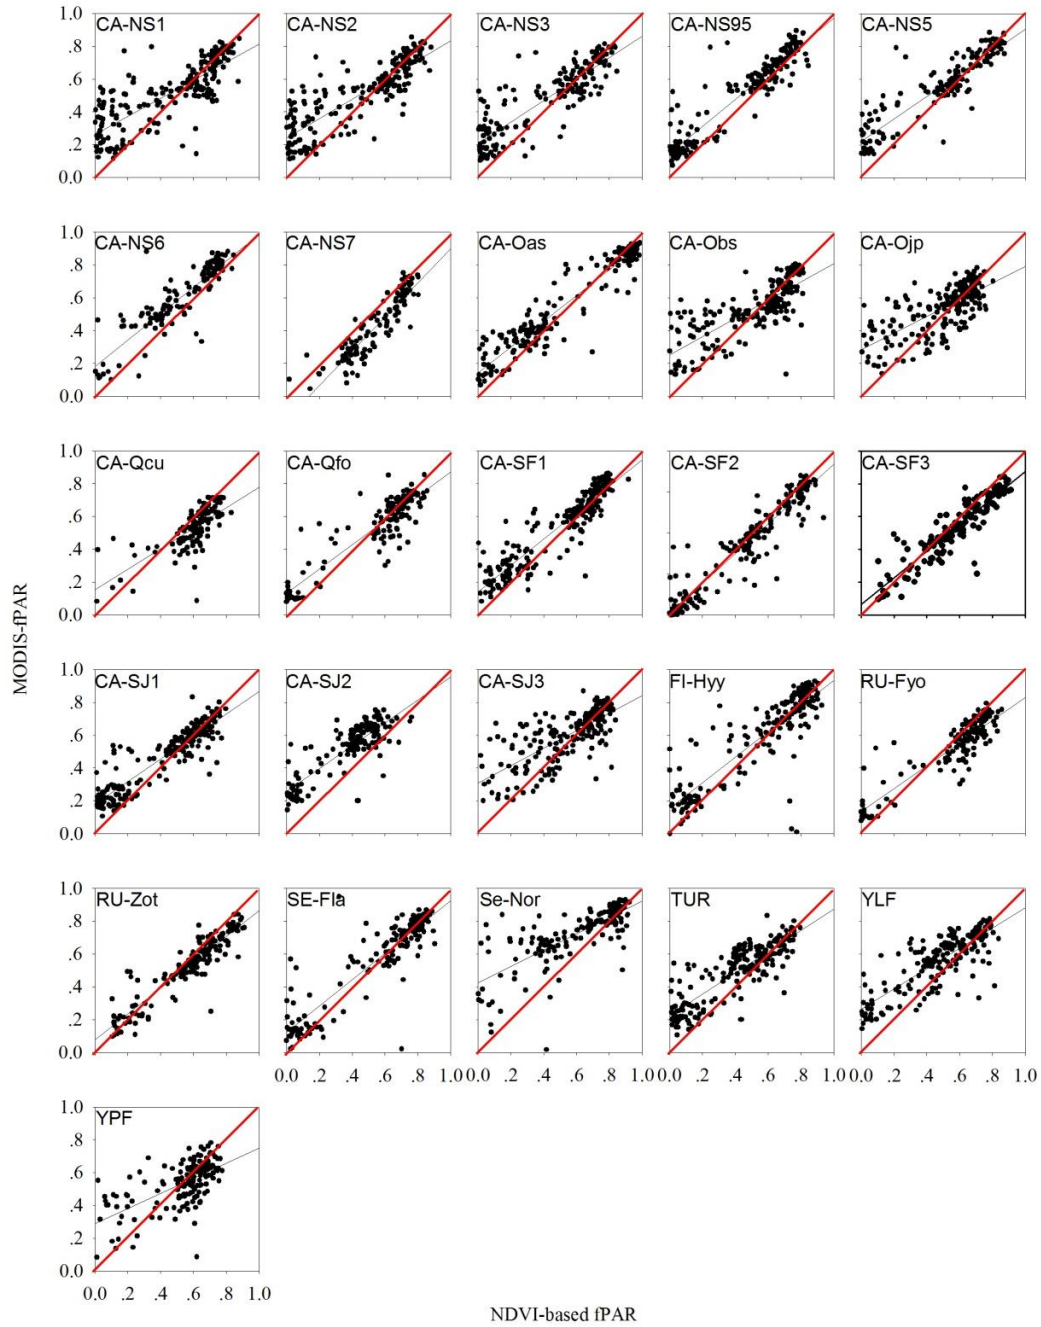

**Supplementary Figure 6.** The relationship between MODIS-fPAR product and the calculated fPAR using linear relationship of NDVI in this study. The red lines indicate the 1:1 line. The 8-day MODIS-fPAR product was used in this analysis.

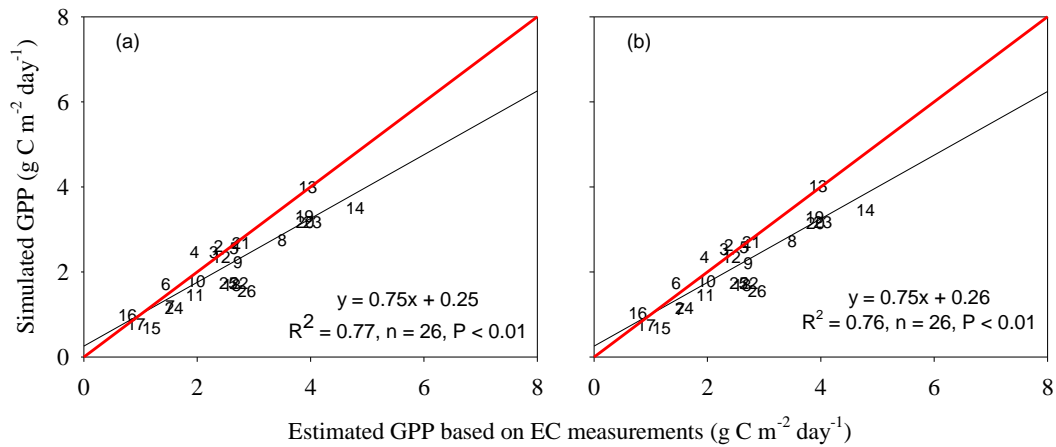

**Supplementary Figure 7.** Model validation of EC-LUE-2p with calculated K\_NDVI based on the relationship between K\_NDVI and stand age. (a) Model validation for a given site using the relationship between K\_NDVI and stand age, derived including all sites. (b) Model validation for a given site using the relationship based on other sites excluding this site. The 1:1 lines are red, and regression lines are black. The numbers in the figures indicate the site-averaged GPP values over the study period shown in Supplementary Table 1.

**Supplementary Table 1** The eddy covariance sites used in this study

| ID <sup>1</sup> | Site <sup>2</sup> | Lat <sup>3</sup> | Long <sup>4</sup> | Age <sup>5</sup> | AMT <sup>6</sup> | AP <sup>7</sup> | Period <sup>8</sup> | Reference |
|-----------------|-------------------|------------------|-------------------|------------------|------------------|-----------------|---------------------|-----------|
| 1               | CA-NS1            | 55.88            | -98.48            | 152              | -2.89            | 500.29          | 2002-2005           | 2         |
| 2               | CA-NS2            | 55.91            | -98.52            | 72               | -2.88            | 499.82          | 2001-2005           | 2         |
| 3               | CA-NS3            | 55.91            | -98.38            | 38               | -2.87            | 502.22          | 2001-2005           | 2         |
| 4               | CA-NS95           | 55.90            | -98.21            | 7                | -2.93            | 498.21          | 2001-2005           | 1         |
| 5               | CA-NS5            | 55.86            | -98.49            | 21               | -2.87            | 500.34          | 2001-2005           | 2         |
| 6               | CA-NS6            | 55.92            | -98.96            | 13               | -3.08            | 495.37          | 2001-2005           | 2         |
| 7               | CA-NS7            | 56.63            | -99.95            | 4                | -3.52            | 483.27          | 2002-2005           | 2         |
| 8               | CA-Oas            | 53.63            | -106.19           | 83               | 0.34             | 428.53          | 2000-2005           | 3         |
| 9               | CA-Obs            | 53.99            | -105.12           | 111              | 0.79             | 405.60          | 2000-2005           | 4         |
| 10              | CA-Ojp            | 53.92            | -104.69           | 91               | 0.12             | 430.50          | 2000-2005           | 5         |
| 11              | CA-Qcu            | 49.26            | -74.04            | 57               | 0.13             | 949.00          | 2003-2005           | 6         |



|    |        |       |         |     |        |        |           |        |
|----|--------|-------|---------|-----|--------|--------|-----------|--------|
| 12 | CA-Qfo | 49.69 | -74.34  | 100 | 0.00   | 961.31 | 2003-2005 | 4      |
| 13 | CA-Sf1 | 54.48 | -105.82 | 25  | -0.15  | 423.69 | 2003-2005 | 7      |
| 14 | CA-Sf2 | 54.25 | -105.88 | 13  | -0.88  | 435.12 | 2001-2005 | 7      |
| 15 | CA-Sf3 | 54.09 | -106.01 | 4   | 0.08   | 441.78 | 2001-2005 | 7      |
| 16 | CA-Sj1 | 53.91 | -104.66 | 8   | 0.13   | 430.23 | 2001-2005 | 8      |
| 17 | CA-Sj2 | 53.95 | -104.65 | 0   | 0.11   | 430.33 | 2003-2005 | 9      |
| 18 | CA-Sj3 | 53.87 | -104.65 | 27  | 0.13   | 433.33 | 2003-2005 | 8      |
| 19 | FI-Hyy | 61.85 | 24.28   | 40  | 2.18   | 620.20 | 2000-2003 | 10     |
| 20 | RU-Fyo | 56.46 | 32.92   | 183 | 4.91   | 704.00 | 2000-2006 | 11     |
| 21 | RU-Zot | 60.80 | 89.35   | 200 | -3.27  | 536.00 | 2002-2004 | 12, 13 |
| 22 | SE-Fla | 64.12 | 19.45   | 28  | 0.27   | 615.98 | 2001-2002 | 14     |
| 23 | SE-Nor | 60.08 | 17.47   | 100 | 5.45   | 561.02 | 2003      | 14     |
| 24 | TUR    | 64.12 | 100.46  | 102 | -9.17  | 317.00 | 2004      | -      |
| 25 | YLF    | 62.25 | 129.25  | 160 | -10.40 | 259.00 | 2004      | 15     |
| 26 | YPF    | 62.25 | 129.65  | 60  | -10.40 | 259.00 | 2004      | 16     |

---

<sup>1</sup>Site label. <sup>2</sup>Abbreviation of EC site name. <sup>3</sup>Positive values indicate north latitude. <sup>4</sup>Negative values indicate west longitude, and positive values indicate east longitude. <sup>5</sup>Stand age in 2002.

<sup>6</sup>Annual mean temperature (°C). <sup>7</sup>Total annual precipitation (mm). <sup>8</sup>The study period.

## Supplementary Notes

### Supplementary Note 1

#### Data at the EC sites

Data obtained at 26 EC sites in North America, Europe and Asia were used in this study to validate 4 LUE models and to calibrate the EC-LUE-2p model (Supplementary Table 1). They covered various stages of ecological successions in the boreal biome: deciduous broadleaf forests, mixed forests, evergreen needleleaf forests and grasslands. The EC data used in this study were obtained from the websites of AmeriFLUX (<http://public.ornl.gov/ameriflux>), CarboEuropeIP (<http://gaia.agraria.unitus.it/database/carboeuropeip/>), Canada-FLUXNET (<http://www.fluxnet-canada.ca/>) and AsiaFlux (<http://www.asiaflux.net/>). Supplementary information on the vegetation, climate, and soil at each site is available online. Half-hourly or hourly averaged PAR, T and friction velocity ( $u^*$ ) were used with net ecosystem exchange of CO<sub>2</sub> (NEE) in this study. Datasets that were gap-filled by site investigators were used directly for this study (i.e., the LaThuile database)<sup>17</sup>.

For the sites that were not in the LaThuile database (i.e., TUR, YLF, YPF; Supplementary Table 1), the following established procedures were used to process the data<sup>18</sup>. Nonlinear regression relationships between measured fluxes and controlling environmental variables (air temperature, PAR) were fit to fill the missing data using a 15-day moving window. The van't Hoff equation was used to fill the missing nighttime NEE ( $F_{c,night}$ )<sup>19</sup>:

$$F_{c,night} = A \times e^{(B \times T)} \quad (1)$$

where  $A$  and  $B$  are estimated model coefficients, and  $T$  is air temperature. A Michaelis-Menten light response equation was used to fill the missing daytime NEE ( $F_{c,day}$ )<sup>20</sup>:

$$F_{c,day} = \frac{\alpha \times \text{PAR} \times F_{GPP,sat}}{F_{GPP,sat} + \alpha \times \text{PAR}} - F_{RE,day} \quad (2)$$

where  $F_{GPP,sat}$  (GPP at saturating light) and  $\alpha$  (initial slope of the light response function) are empirically estimated coefficients, and  $F_{RE,day}$  (ecosystem respiration) was estimated by extrapolation of Eq. (3) using the daytime air temperature. Daily NEE, ecosystem respiration ( $Re$ ), and meteorological variables were synthesized based on half-hourly or hourly values, and the daily values were recorded as missing when more than 20% of the data from a given day was missing; otherwise, daily values were calculated by multiplying the averaged half-hourly or hourly rate by 24 hours<sup>21</sup>. GPP was calculated as the sum of NEE and  $Re$ . Based on the daily dataset, 8-day GPP mean value can be calculated. If more than 2 days of daily data were missing within a given 8-day period, the 8-day value was indicated as missing.

## Supplementary References

1. Goulden, M.L. *et al.* Patterns of NPP, GPP, respiration, and NEP during boreal forest succession. *Glob. Change Biol.* 17, 855-871 (2011).
2. Goulden, M.L. *et al.* An eddy covariance mesonet to measure the effect of forest age on land-atmosphere exchange. *Glob. Change Biol.* 12, 2146-2162 (2006).
3. Barr, A.G. *et al.* Inter-annual variability in the leaf area index of a boreal aspen-hazelnut forest in relation to net ecosystem production. *Agr. For. Meteorol.* 126, 237-255 (2004).
4. Bergeron, O. *et al.* Comparison of carbon fluxes over three boreal black spruce forests in Canada. *Glob. Change Biol.* 12, 1-19 (2006).
5. Chen, J.M. *et al.* Boreal ecosystems sequestered more carbon in warmer years. *Geophys. Res. Lett.* 33, 10, L10803, doi: 10.1029/2006GL025919 (2006).
6. Giasson, M.A., Coursolle, C. & Margolis, H.A. Ecosystem-level CO<sub>2</sub> fluxes from a boreal cutover in eastern Canada before and after scarification. *Agr. For. Meteorol.* 140, 23-40 (2006).
7. Mkhabela, M.S. *et al.* Comparison of carbon dynamics and water use efficiency following fire and harvesting in Canadian boreal forests. *Agr. For. Meteorol.* 149, 783-794 (2009).
8. Amiro, B.D. *et al.* Carbon, energy and water fluxes at mature and disturbed forest sites, Saskatchewan, Canada. *Agr. For. Meteorol.* 136, 237-251 (2006).
9. Coursolle, C. *et al.* Late-summer carbon fluxes from Canadian forests and peat-lands along an east-west continental transect. *Can. J. For. Res.* 36, 783-800 (2006).
10. Suni, T. *et al.* Long-term measurements of surface fluxes above a Scots pine forest in Hyytiälä, southern Finland, 1996–2001. *Boreal Environ. Res.* 8, 287-301 (2003a).

11. Milyukova, I.M. *et al.* Carbon balance of a southern taiga spruce stand in European Russia. *Tellus*, 54B, 429-442 (2002).
12. Suni, T. *et al.* Air temperature triggers the recovery of evergreen boreal forest photosynthesis in spring. *Glob. Change Biol.* 10, 1410-1426 (2003b).
13. Schulze, E.D. *et al.* The Eurosiberian transect: an introduction to the experimental region. *Tellus*, 54B, 421-428 (2002).
14. Lindroth, A., Grelle, A. & Morén, A.S. Long-term measurements of boreal forest carbon balance reveal large temperature sensitivity. *Glob. Change Biol.* 4, 443-450 (1998).
15. Ohta, T. *et al.* Interannual variation of water balance and summer evapotranspiration in an eastern Siberian larch forest over a 7-year period (1998-2006). *Agr. For. Meteorol.* 140, 1941-1953 (2008).
16. Matsumoto, K. *et al.* Responses of surface conductance to forest environments in the Far East. *Agr. For. Meteorol.* 140, 1926-1940 (2008).
17. Agarwal, D.A. *et al.* A data-centered collaboration portal to support global carbon-flux analysis. *Concurrency Comput. Pract. Exper.* 22, 2323-2334 (2010).
18. Desai, A.R. *et al.* Cross site evaluation of eddy covariance GPP and RE decomposition techniques. *Agr. For. Meteorol.* 148, 821-838 (2008).
19. Lloyd, L. & Taylor, J.A. On the temperature dependence of soil respiration. *Funct. Ecol.* 8, 315-323 (1994).
20. Falge, E. *et al.* Gap filling strategies for defensible annual sums of net ecosystem exchange. *Agr. For. Meteorol.* 107, 43-69 (2001).

21 Yuan, W.P. *et al.* Global estimates of evapotranspiration and gross primary production based on MODIS and global meteorology data. *Remote Sens. Environ.* 114, 1416-1431 (2010).
